# Supplementary material for: Dynamic PET Reveals Compartmentalized Brain and Lung Tissue Antibiotic Exposures
Source: Research Square preprint supplement (doi:10.21203/rs.3.rs-4096014/v1), 2024-03-21
Supplement: Supplementary file 1 [file bbc7744c5f976abbb0233217.docx]

Title: Dynamic PET Reveals Compartmentalized Brain and Lung Tissue Antibiotic Exposures

Xueyi Chen1,2,3†, Bhavatharini Arun4†, Oscar J. Nino-Meza1,2,3†, Mona O. Sarhan1,2,3, Medha Singh1,2,3, Byeonghoon Jeon1,2,3, Kishor Mane5, Maunank Shah6, Elizabeth W. Tucker1,2,7, Laurence S. Carroll8, Joel S. Freundlich5, Charles A. Peloquin9, Vijay D. Ivaturi4, Sanjay K. Jain1,2,3,8*

1Center for Infection and Inflammation Imaging Research, Johns Hopkins University School of Medicine, Baltimore, MD, USA

2Center for Tuberculosis Research, Johns Hopkins University School of Medicine, Baltimore, MD, USA

3Department of Pediatrics, Johns Hopkins University School of Medicine, Baltimore, MD, USA

4Center for Translational Medicine, University of Maryland School of Pharmacy, Baltimore, MD, USA

5Department of Pharmacology, Physiology, and Neuroscience, Rutgers New Jersey Medical School, Newark, NJ, USA

6Department of Medicine, Johns Hopkins University School of Medicine, Baltimore, MD, USA

7Department of Anesthesiology and Critical Care Medicine, Johns Hopkins University School of Medicine, Baltimore, MD, USA

8Russell H. Morgan Department of Radiology and Radiological Science, Johns Hopkins University School of Medicine, Baltimore, MD, USA.

9Infectious Disease Pharmacokinetics Laboratory, Pharmacotherapy and Translational Research, University of Florida College of Pharmacy, Gainesville, FL, USA

†Authors contributed equally

*Corresponding author email:[sjain5@jhmi.edu](mailto:sjain5@jhmi.edu)

**methods**

**General Materials**

All chemicals and solvents were reagent grade and purchased from a commercial supplier. They were used as received unless otherwise noted. No unexpected or unusually significant safety hazards were encountered. Whenever required, reactions were conducted under a nitrogen atmosphere and anhydrous solvents were utilized. Chemical shifts (δ) are reported in parts per million (ppm) relative to residual undeuterated solvent as the internal reference and coupling constants (*J*) are reported in Hertz (Hz). Splitting patterns are indicated as follows: s = singlet, d = doublet, t = triplet, q = quartet, qn = quintet, dd = doublet of doublet, dt = doublet of triplet, m = multiplet, br = broad peak.

**Radiosynthesis and validation of 18F-sutezolid**

Synthesis of 4-(4-nitro-2-(4,4,5,5-tetramethyl-1,3,2-dioxaborolan-2-yl)phenyl) thiomorpholine (**2**) (**Fig. S3**): A solution of 2-(2-fluoro-5-nitrophenyl)-4,4,5,5-tetramethyl-1,3,2-dioxaborolane **1** (10.0 g, 37.4 mmol) in anhydrous toluene (100 mL) was subjected to the addition of thiomorpholine (5.79 g, 56.1 mmol) and stirred at 110 °C for 12 h. The reaction mixture was cooled to room temperature (rt), diluted with ethyl acetate, and washed with water and then saturated aqueous brine solution. The organic layer was then dried over anhydrous sodium sulfate and concentrated *in vacuo*. The solid residue was purified using silica gel column chromatography on silica gel (EtOAc/hexanes) to obtain the desired compound **2** as a yellow solid (5.34 g, 15.2 mmol, 41.0%).

Synthesis of (S)-(5-(5-((1,3-dioxoisoindolin-2-yl)methyl)-2-oxooxazolidin-3-yl)-2 -thiomorpholino-phenyl) boronic acid (**4**): To a suspension of **2** (2.10 g, 5.99 mmol) in methanol (50 mL) at rt was added 10 wt % palladium on carbon (0.20 g). The resulting reaction mixture was stirred for 12 h at rt under a hydrogen-filled balloon (1 atm). After completion of the reaction, the reaction mixture was filtered through a pad of Celite and the solvent was removed under reduced pressure to afford the crude product **3** (3-(4,4,5,5-tetramethyl-1,3,2-dioxaborolan-2-yl)-4-thiomorpholinoaniline) as a brown oil (1.90 g, 5.93 mmol, 99.0%) which was directly used in the next step without further purification. To a solution of **3** (1.90 g, 5.93 mmol) in EtOH: H2O (9:1) (50 mL) was added (*S*)-*N*-glycidylphthalimide (1.80 g, 8.89 mmol) at rt. The reaction mixture was refluxed for 28 h, and after completion of the reaction as indicated by LC-MS analysis, the solvent was removed under reduced pressure. The crude reaction product was obtained and directly used in the next step without purification. It was, thus, dissolved in dichloromethane (40 mL) and 1,1'-carbonyldiimidazole (3.84 g, 23.7 mmol) was added. The reaction was stirred at rt under a nitrogen atmosphere for 12 h. After completion of the reaction as judged by LC-MS, the solvent was removed under reduced pressure to afford **4** as a brown solid (2.30 g, 4.92 mmol) which was used in the next step without further purification.

Synthesis of (S)-(5-(5-(acetamidomethyl)-2-oxooxazolidin-3-yl)-2-thiomorpholinophenyl) boronic acid (**6**): To a solution of **4** (2.20 g, 4.70 mmol) in methanol (50 mL), hydrazine monohydrate (0.590 g, 11.8 mmol) was added, and the resulting mixture was stirred at 65 °C for 1 – 2 h. The reaction mixture was cooled to rt, and the resulting solid, 2,3-dihydrophthalazine-1,4-dione, was removed by filtration. The filtrate was concentrated under reduced pressure and dissolved in dichloromethane and stirred at 0 °C for 30 min. Further precipitated 2,3-dihydrophthalazine-1,4-dione was removed by filtration. The filtrate was concentrated under reduced pressure to afford the crude product **5** ((*S*)-(5-(5-(aminomethyl)-2-oxooxazolidin-3-yl)-2-thiomorpholinophenyl) boronic acid) as a brown viscous oil. To a crude solution of **5** and triethylamine (0.714 g, 7.06 mmol) in anhydrous methylene chloride (25 mL) was slowly added acetic anhydride (0.576 g, 5.65 mmol) at 0 °C. After stirring the mixture at rt for 4 h, the reaction mixture was concentrated under reduced pressure to provide crude **6** (1.60 g, 4.21 mmol).

Synthesis of sutezolid precursor (S)-N-((2-oxo-3-(3-(4,4,5,5-tetramethyl-1,3,2-dioxaborolan-2-yl)-4-thiomorpholino phenyl)oxazolidin-5-yl)methyl)acetamide (**7**): To a solution of crude **6** (1.50 g, 3.96 mmol) in anhydrous THF (50 mL) was added pinacol (560 mg, 4.75 mmol) and 4 Å molecular sieves (2.32 g) at rt and the resulting mixture was stirred for 12 h. After completion of the reaction, the mixture filtered through a pad of Celite and then concentrated under reduced pressure to afford the desired product (**7, Scheme 1**) as a brown solid (748 mg, 1.62 mmol, 41.0%): 1H NMR (500 MHz, d6-DMSO) δ 8.24 (t, J = 5.8 Hz, 1), 7.64 (d, J = 2.8 Hz, 1), 7.51 (dd, J = 8.8, 2.8 Hz, 1), 7.02 (d, J = 8.8 Hz, 1), 4.66 (m, 1), 4.07 (t, J = 8.9 Hz, 1), 3.70 (dd, J = 8.8, 6.5 Hz, 1), 3.41 (dd, J = 8.5, 5.4 Hz, 2), 3.17 - 3.09 (m, 4), 2.77 (m, 4), 1.84 (s, 3), 1.30 (s, 12). Also noted δ 5.7 (s, CH2Cl2), 1.2 (s), 0.9 (m). 13C NMR (126 MHz, d6-DMSO) δ 169.9, 155.1, 154.2, 132.4, 126.2, 122.1, 118.8, 83.3, 71.4, 55.6, 47.5, 41.4, 27.4, 24.6, 22.4. One aromatic carbon was unaccounted for. Calculated for the boronic acid C16H23BN3O5S [M+H]+ = 380.1451; observed 380.1444. The characterization data for **7** is shown in **Fig. S4**.

Radiosynthesis (**8**): Aqueous18F-fluoride (target wash, Johns Hopkins PET center, 2 mL) was trapped on a QMA cartridge pre-equilibrated with Trace-Select Water (10 mL). The trapped 18F was eluted from the cartridge with a 1 mL solution consisting of Kryptofix2.2.2 (15 mg, 39.84 µmol), potassium carbonate (0.1 mg, 0.72 µmol) and potassium trifluoromethansulfonate (5 mg, 26.57 µmol) in acetonitrile (80%) into a Wheaton V-vial. The solution was dried under a constant stream of N2 at 110 °C. K18F was then dried by azeotropic distillation with acetonitrile (500 µL x 2). After complete drying, 4.5 mg of **7** (9.75 µmol) and Cu(pyridine)4(OTf)2 (12.8 mg, 18.82 µmol) dissolved in 500 µL anhydrous DMF were added to the dried K18F. The reaction was allowed to proceed under air flow for 30 min at 120 ˚C. The crude reaction was then quenched with distilled water, filtered through a syringe filter (Puradisc 13mm, 0.2 µm) and injected into a radio-HPLC. The purification of 18F-sutezolid was done using reversed phase method using Phenomenex Luna C18(2) 100Å, 250 x 10 mm column at a flow rate of 2 mL/min using gradient elution of a mobile phase consisting of water and ethanol both containing 0.1% trifluoracetic acid. The following gradient was used; 30- 35% for 15 min then 35-30% ethanol for another 15 min. 18F-Sutezolid was eluted at 23 min. The HPLC-purified tracer was diluted with distilled water and trapped on a preactivated Sep-Pak C18 light cartridge, then eluted with a mixture of PBS and ethanol (1:1 *v/v*). Finally, the cartridge purified tracer was diluted with sterile PBS so that the final concentration of ethanol is less than 10%.

*In vivo* validation:C3HeB/FeJ mice (n = 4) were injected with 18F-sutezolid (5.51 ± 0.57 MBq) via the tail vein and tissues collected 60 min after tracer administration. Blood samples were collected via cardiac puncture and organs were flushed with 10 mL of PBS before harvest. All tissues were counted using an automated gamma counter and data are represented as % ID/g after decay correction (**Fig. S5**). In another set of studies, C3HeB/FeJ mice (n = 3 for each time-point) were injected with 18F-sutezolid (3.00 ± 2.9 MBq) via the tail vein and tissues collected 5, 15 and 60 min after tracer administration. Plasma and tissue samples were extracted with ice cold mixture of acetonitrile and methanol (1:1 *v/v*) prior homogenization. Homogenized tissues were then centrifuged (13,000 rpm for 10 min), and all extracted samples were filtered through a syringe filter (Puradisc 13mm, 0.2 µm) before injection into a radio-HPLC. HPLC-eluted fractions were collected at 30 sec intervals and were counted in an automated gamma counter (1282 Compugamma CS Universal gamma counter; LKB Wallac). Data are represented as percentage of each peak of the HPLC-injected dose (**Fig. S5**).

**Red Blood Cell (RBC) partitioning**

Blood from C3HeB/FeJ mice (n = 4 for each time-point) from the 18F-sutezolid *in vivo* validation studieswere collected via cardiac puncture into EDTA tubes (BD Microtainer, Fisher Scientific) and obtained by centrifuging blood samples at 13,000 rpm for 10 min. Blood and plasma fractions were counted (as counts per minute – CPM) in an automated gamma counter (**Table S4**) and the plasma partition coefficient was calculated: Plasmapartition coefficient = CPMplasma / CPMblood. Bedaquiline fumarate was administered orally to C3HeB/FeJ mice (n = 4 for each time-point) and were sacrificed at 4, 12, 24 hours post gavage. Blood and plasma were obtained and bedaquiline and its *N*-desmethyl metabolite (M2) levels were determined by mass spectroscopy (**Table S5**). Bedaquiline plasma partitioning was calculated: Plasmapartition coefficient = Concentrationplasma / Concentrationblood.

**FIGURES**

**
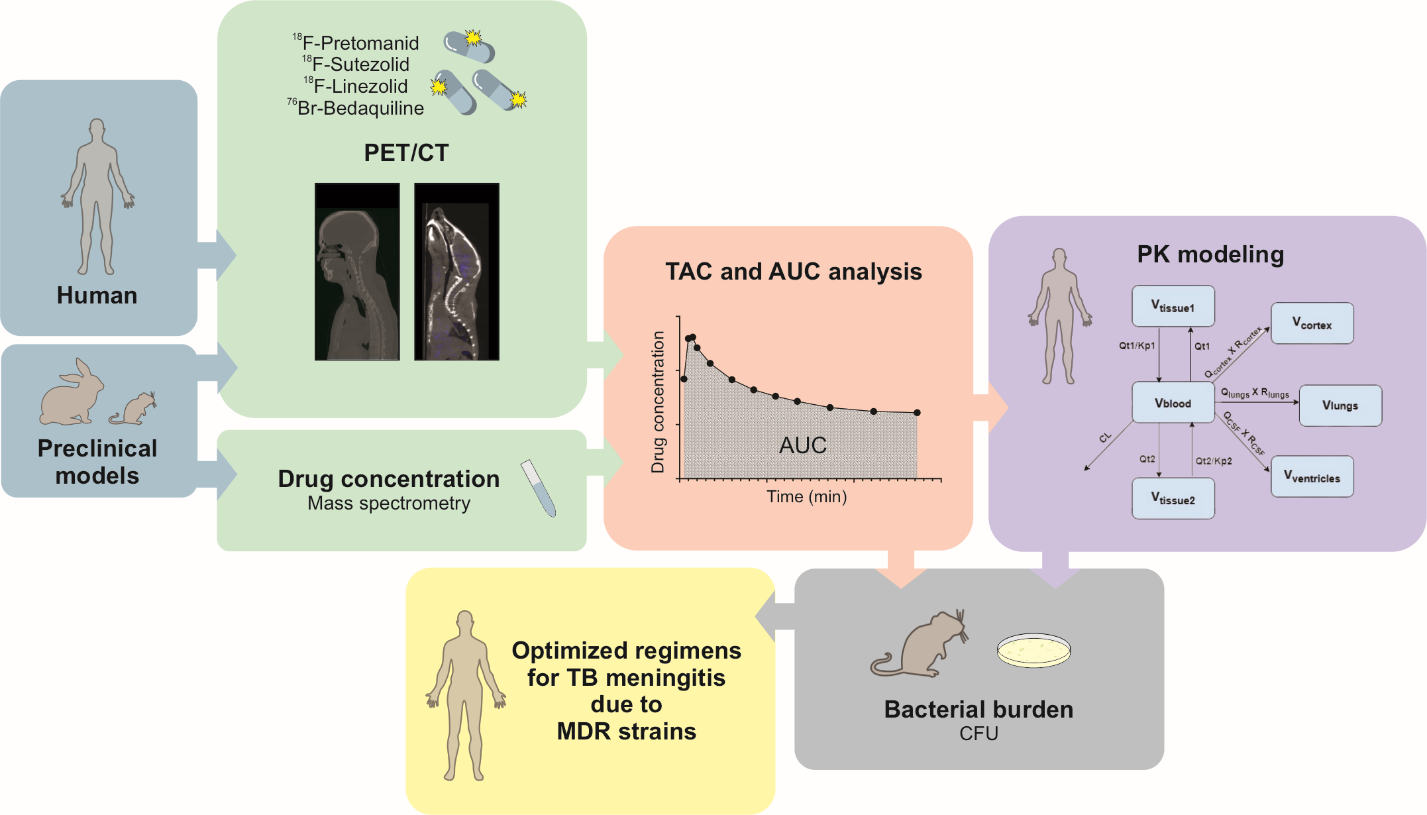
Fig. S1. Study design.** First-in-human dynamic 18F-pretomanid positron emission tomography (PET) studies were performed in eight prospectively enrolled subjects. PET signal was quantified by drawing volumes of interest (VOI) in brain, cerebrospinal fluid (CSF), lung, and left ventricles (blood, converted to plasma) to measure multicompartmental antibiotic exposures [time-activity curve (TAC) and area under the curve (AUC)] and represented as tissue-to-plasma AUC ratio. Dynamic PET was also performed using radioanalogs of antibiotics (18F-pretomanid, 18F-sutezolid, 18F-linezolid and 76Br-bedaquiline) active against MDR strains in mouse and rabbit models of TB. PET-facilitated pharmacokinetic (PK) modeling were performed to predict antibiotic exposures at human equipotent dosing in brain tissues, which were used to design optimized regimens for TB meningitis. These optimized regimens were evaluated in the mouse model of TB meningitis, administered at human equipotent dosing.

**
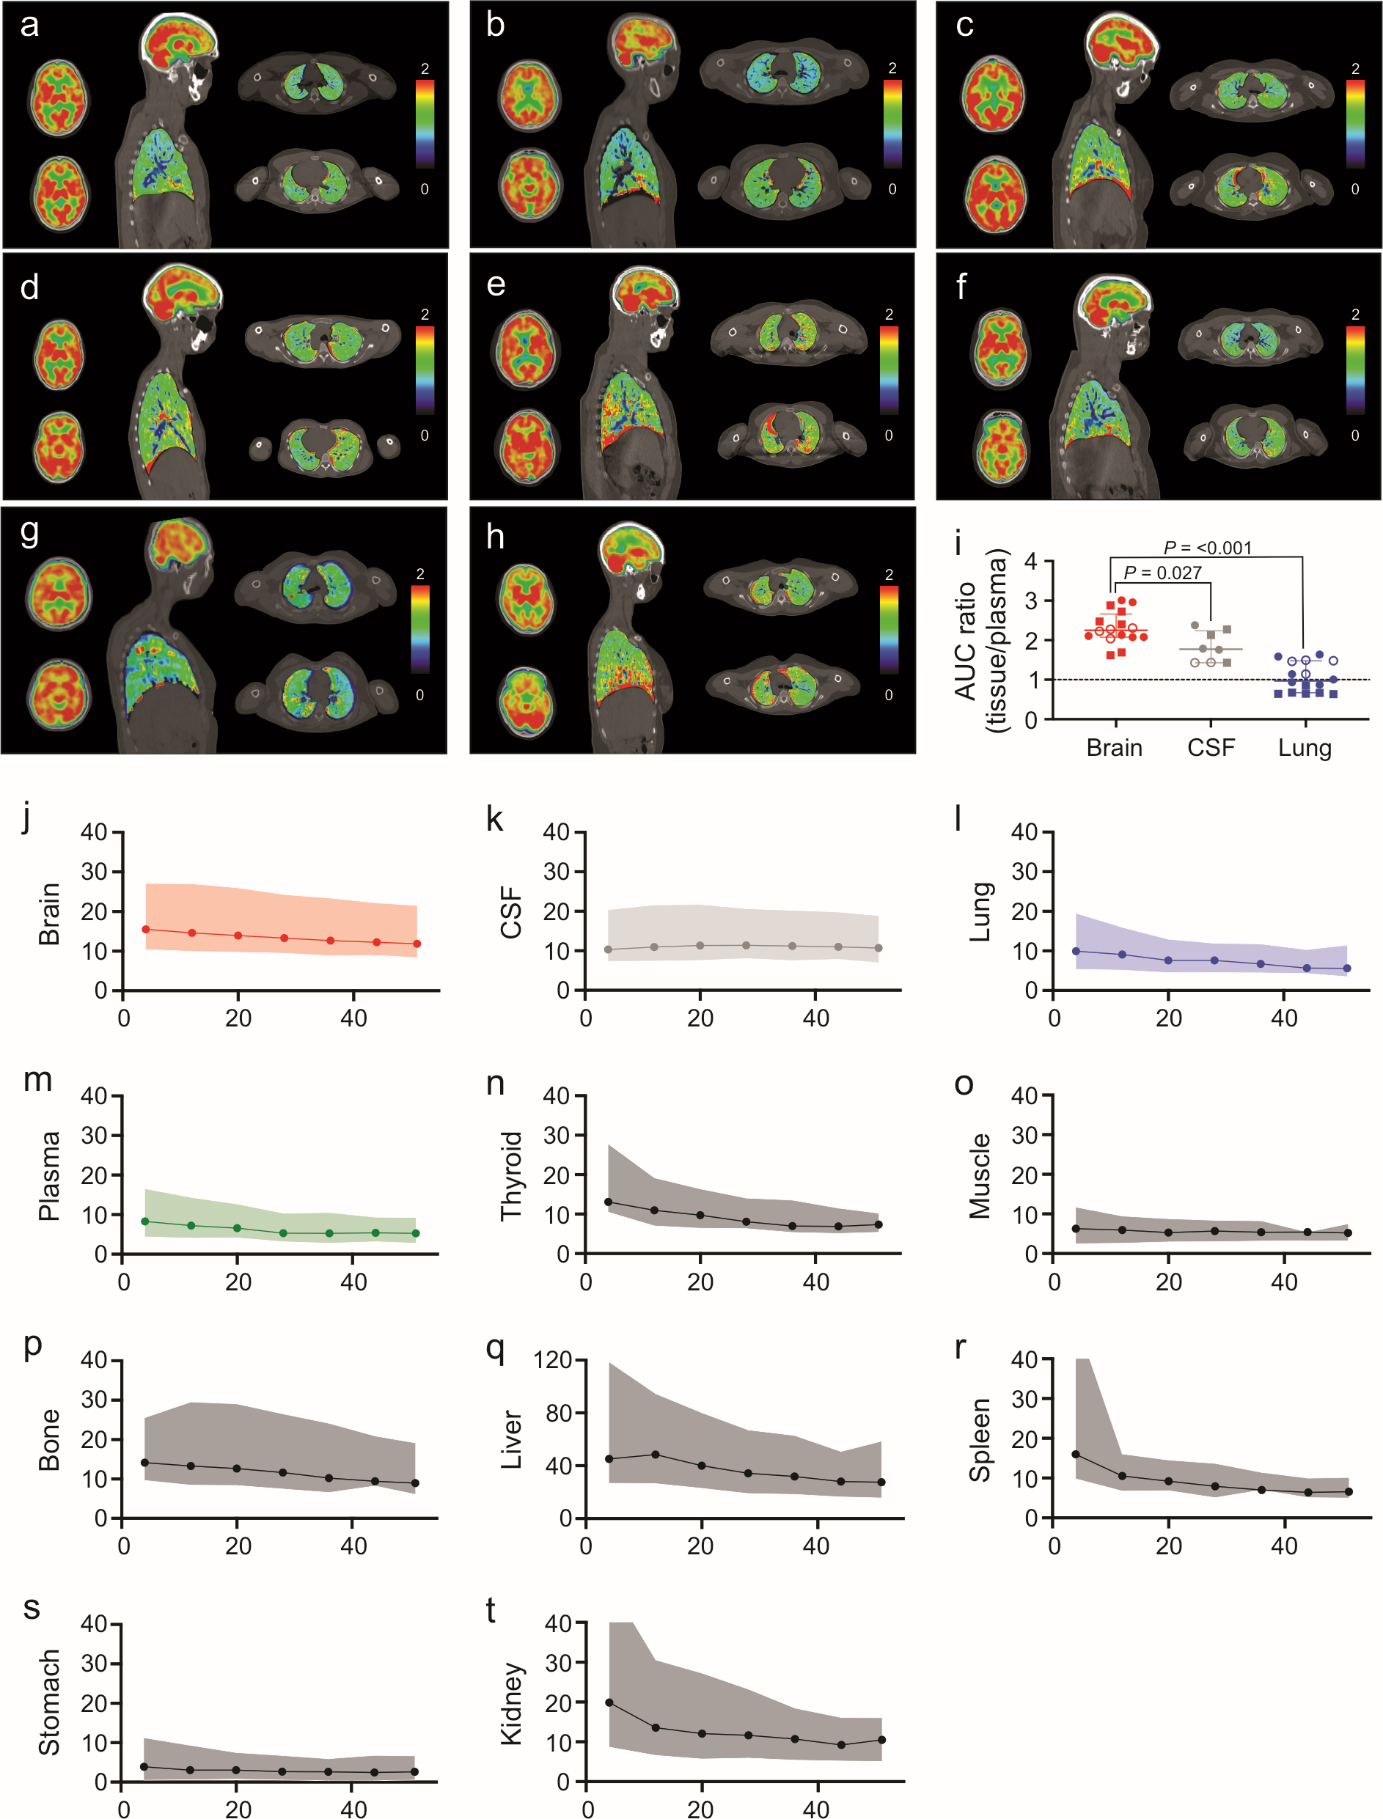
Fig. S2. First-in-human dynamic 18F-pretomanid PET/CT studies in human subjects.** Eight subjects (six healthy volunteers and two newly diagnosed TB patients) were prospectively enrolled and imaged in accordance with the U.S. Food and Drug Administration guidelines (NCT05609552). **a-h**, 18F-Pretomanid PET area under the curve (AUC) heatmap overlay on CT of all subjects (subjects 1-8 respectively). **i**, 18F-Pretomanid (tissue-to-plasma) AUCtissue/plasma ratios from all subjects demonstrate significantly higher brain versus lung tissue exposures and significantly higher brain versus cerebrospinal fluid (CSF) exposures. Circles and squares represent female and male subjects respectively. Empty shapes represent TB patients. **j-t**, 18F-Pretomanid PET time-activity curves from different tissues. n = 2 volumes of interest (VOI) for brain, lung and kidney and n = 1 VOI for CSF, plasma, thyroid, muscle, bone, liver, spleen and stomach per subject. Data are represented as median ± interquartile range. Statistical comparisons were made using a two-tailed Mann-Whitney U test.

**
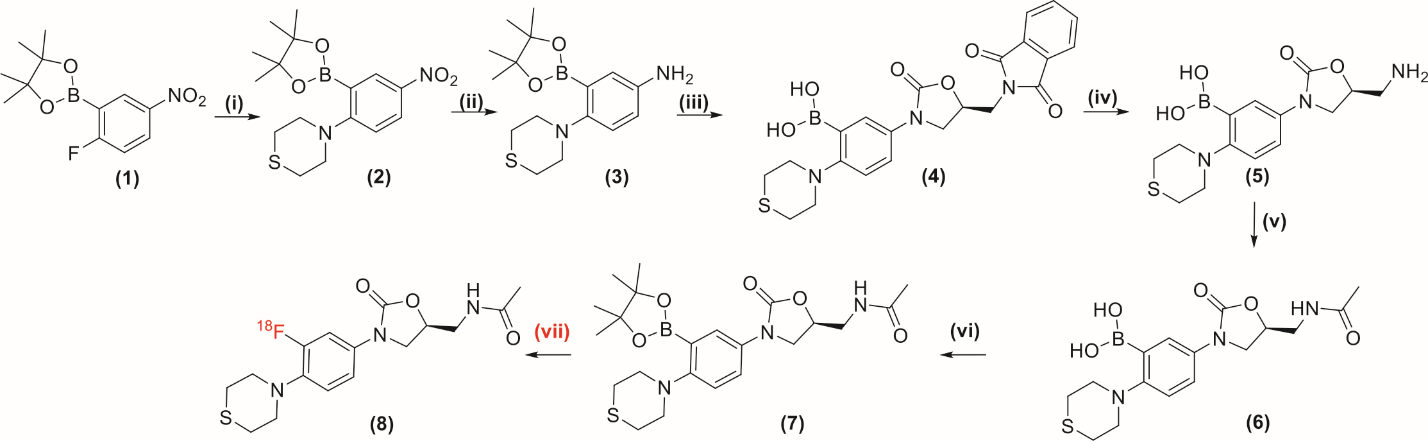
Fig. S3. Chemical synthesis of 18F-sutezolid (8) and its precursor (7).** Reagents and conditions: (i) Thiomorpholine, toluene, 110 °C, 20 h; (ii) 10% Pd/C, H2, MeOH, rt, overnight; (iii) (a) (*S*)-*N*-glycidylphthalimide, MeOH, 65 °C, (b) 1,1-carbonyldiimidazole, DCM, rt, 12 h; (iv) hydrazine hydrate, MeOH, reflux, 1h; (v) acetic anhydride, triethylamine, DCM, 0 °C to rt, 12 h; (vi) pinacol, 4 Å molecular sieves, THF, rt, 12 h; vii) K18F, Na2CO3, K2.2.2, KOTf; DMF, 120 °C, 30 min.

**
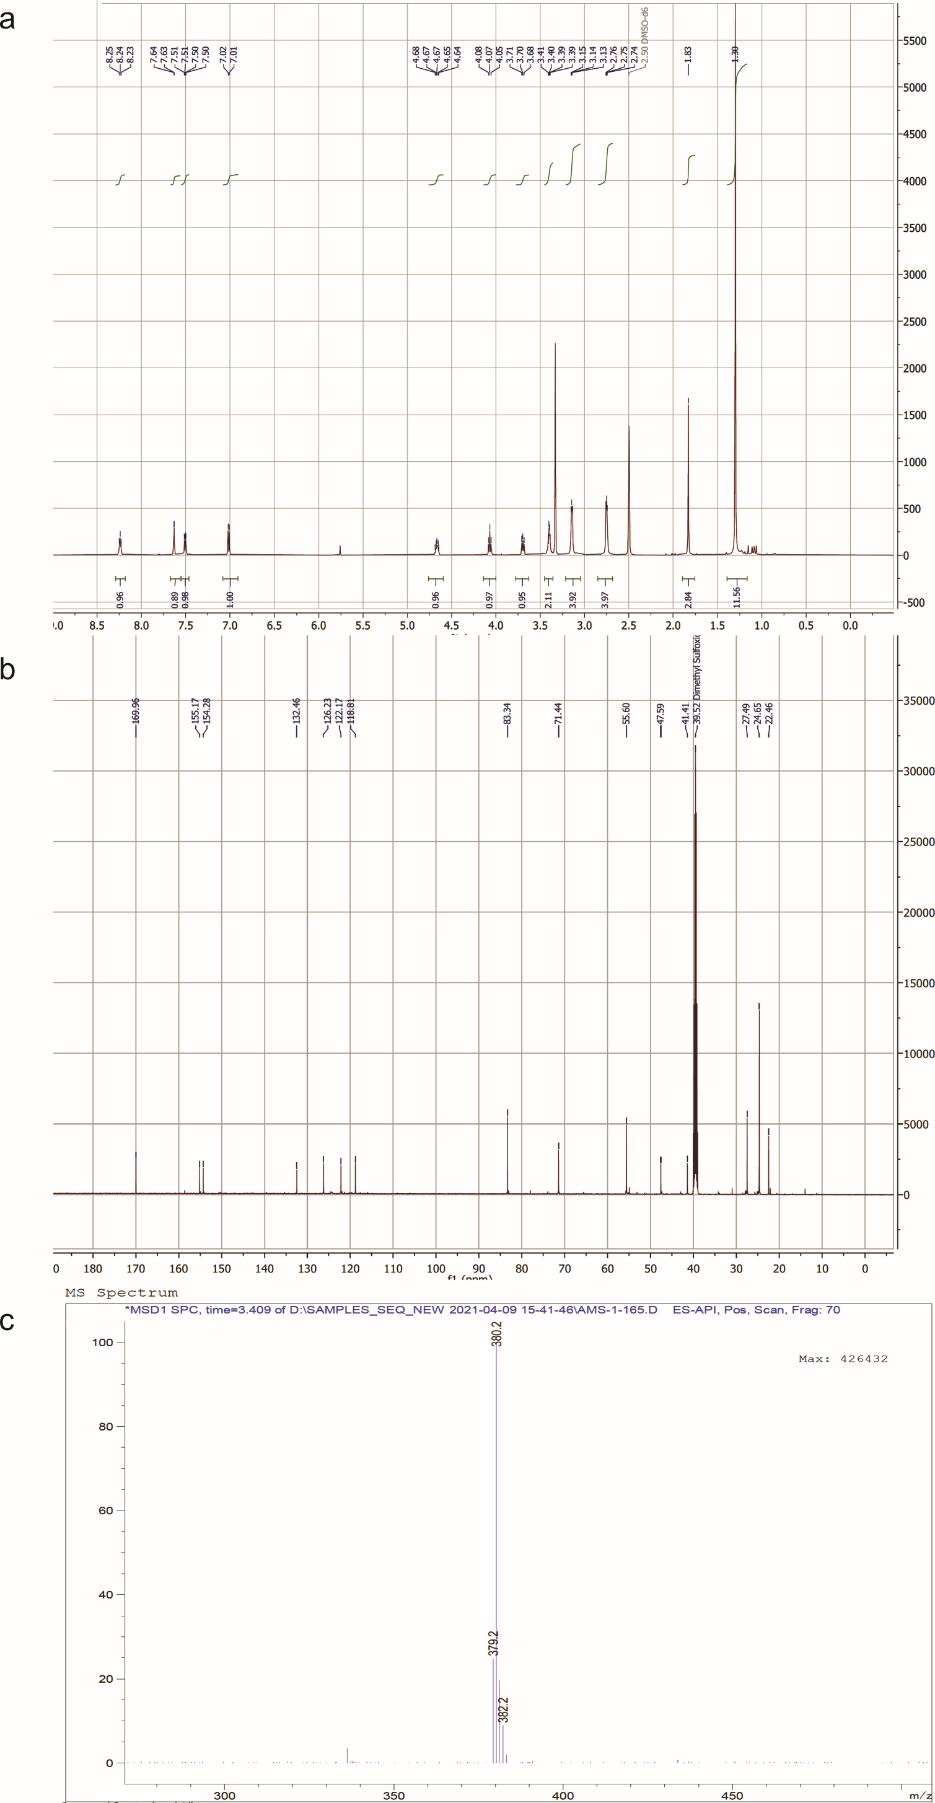
**

**Fig. S4.** **Structural determination of 18F-sutezolid precursor (7).** **a**, 1H NMR. **b**, 13C NMR. **c**, Mass spectrum.

**
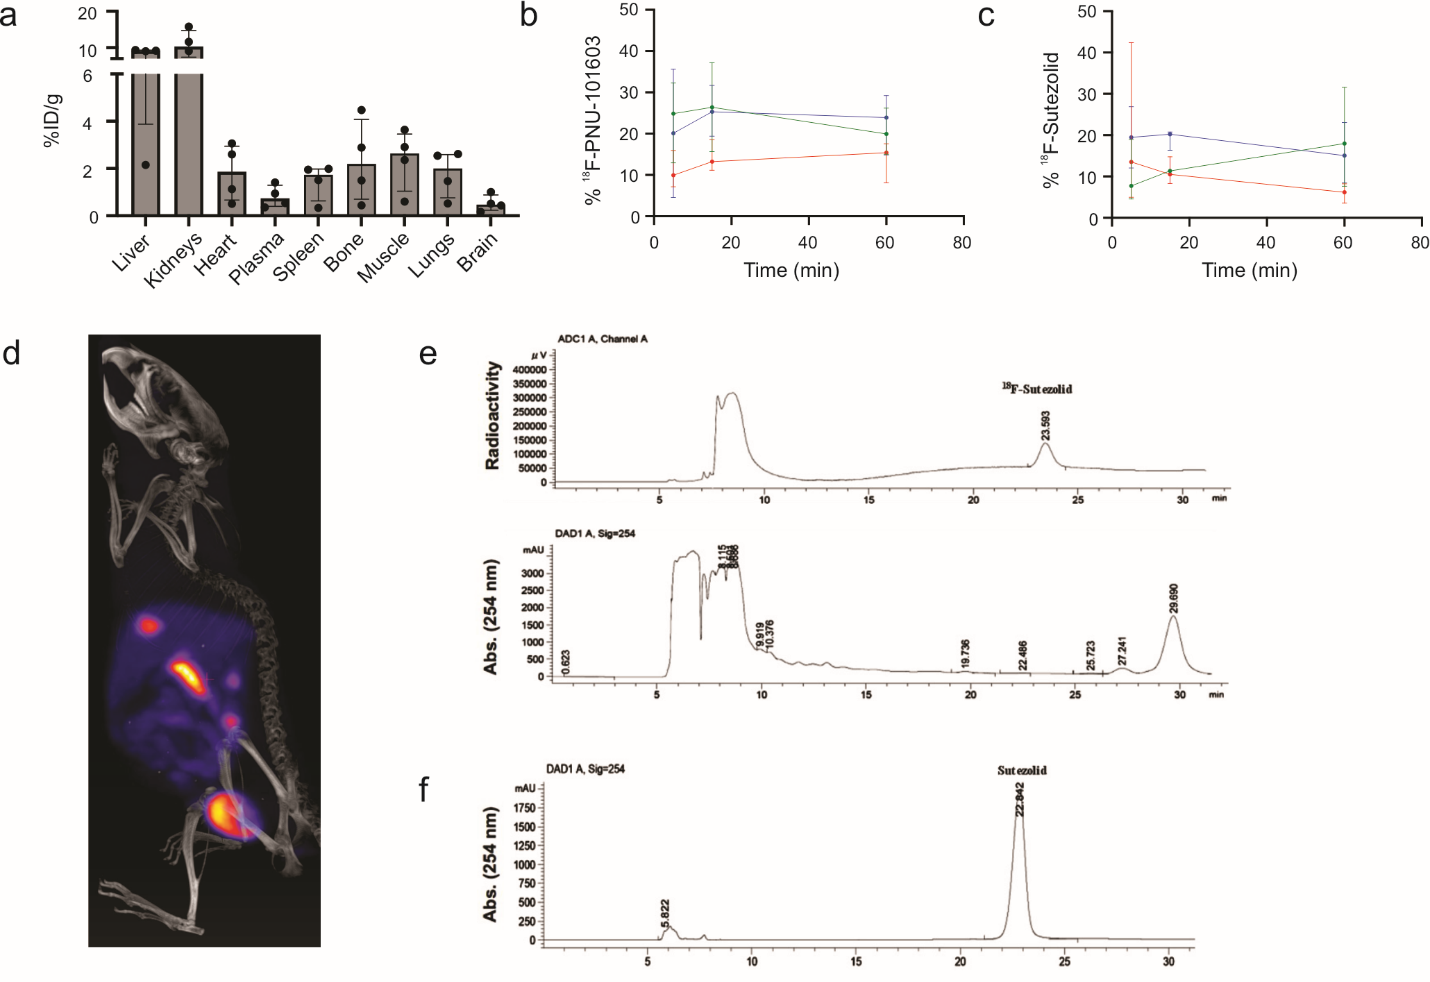
Fig. S5. *In vivo* validation of 18F-sutezolid in healthy mice. a**,Postmortem biodistribution of 18F-sutezolid at 1 hour post-injection using gamma counting.Percentage of 18F-sutezolid metabolite (18F-PNU-101603, panel **b**) and 18F-sutezolid (panel **c**) as determined in the plasma, brain and lungs extracts of healthy mice at 5, 15 and 60 min post tracer injection. **d**, 18F-Sutezolid PET/CT maximum intensity projections (MIP) at 1 hour post-injection showing the whole-body distribution. **e**, HPLC radio-chromatogram of crude 18F-sutezolid radiolabeling reaction. **f**, HPLC chromatogram of standard sutezolid.


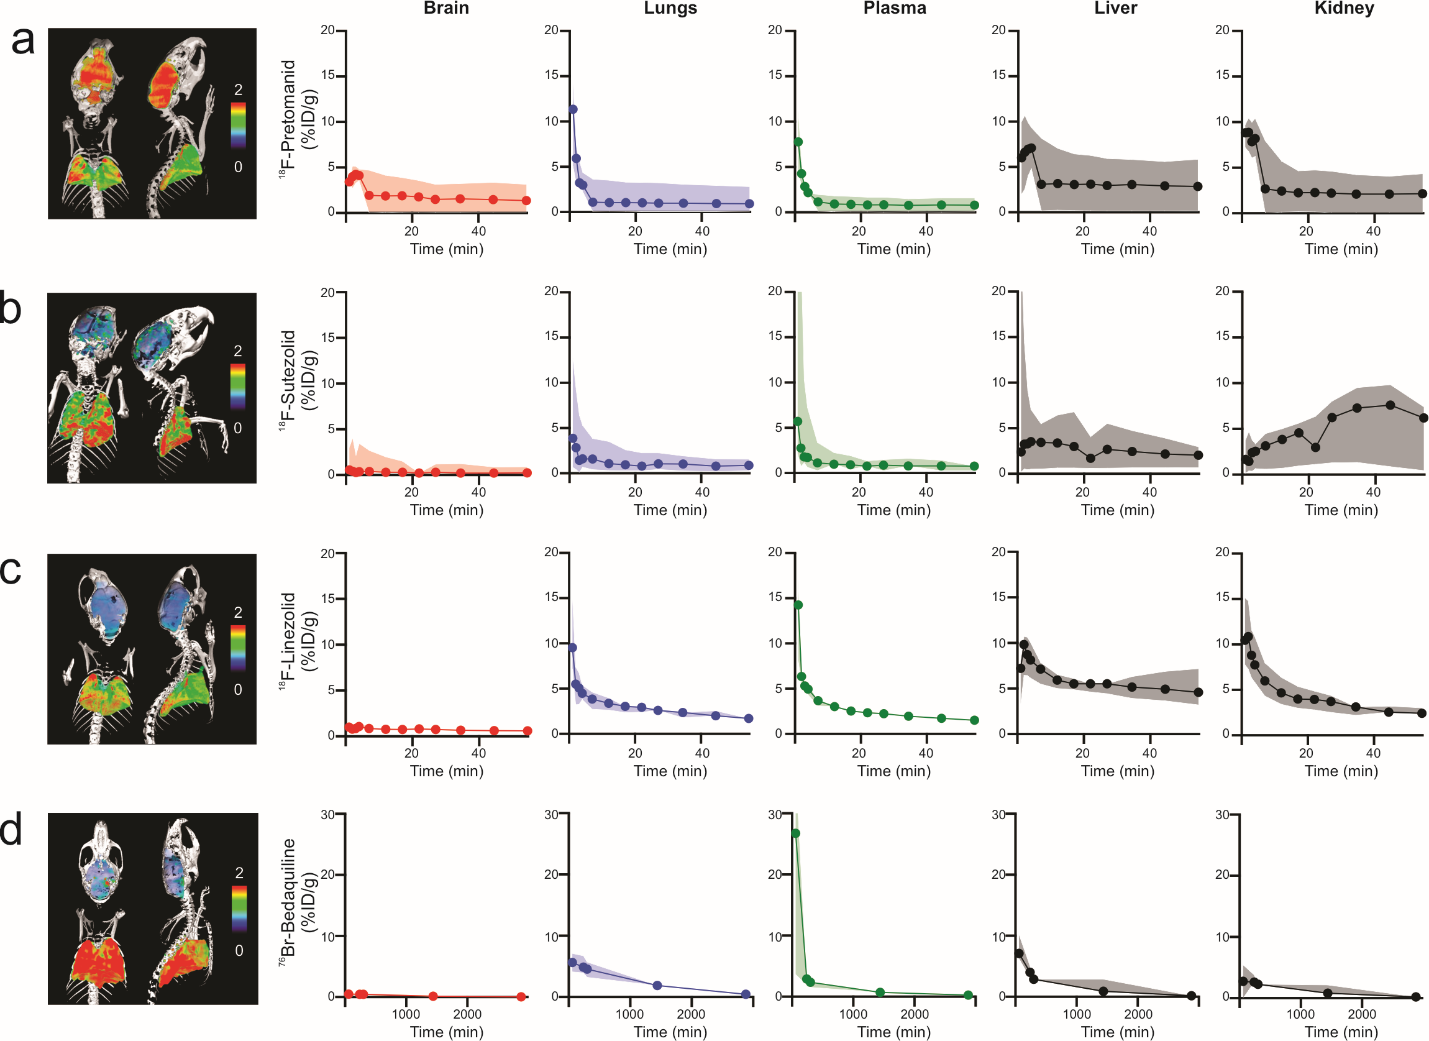


**Fig. S6. Compartmentalized antibiotic exposures in mouse studies.** Radioanalog of four antibiotics active against multidrug-resistant (MDR) *Mycobacterium tuberculosis* strains were utilized in mouse studies. Each radioanalog is chemically identical to the respective parent antibiotic and the radioisotope is retained within the major metabolite. Three-dimensional maximal intensity projection (MIP) of CT with 18F-pretomanid (panel **a**), 18F-sutezolid (panel **b**), 18F-linezolid (panel **c**) and 76Br-bedaquiline (panel **d**) PET AUC coronal (left) and sagittal (middle) heatmap overlays (representing AUCtissue/plasma ratio) from representative mice, demonstrating spatially compartmentalized antibiotic exposures in lung and brain compartments are shown. The corresponding PET time-activity curves from different tissues are shown. Data are represented as median ± interquartile range.

**
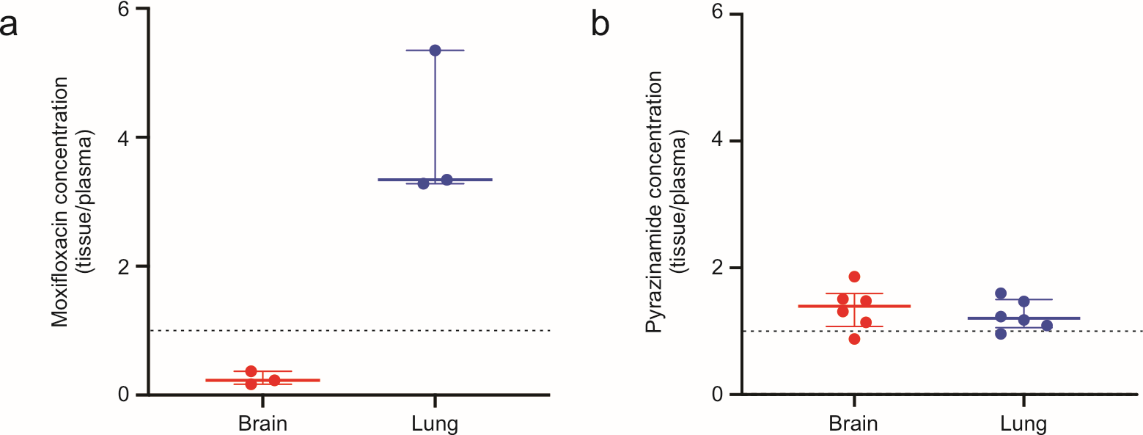
**

**Fig. S7. Antibiotic tissue penetration using mass spectrometry.** Tissue-to-plasma ratios from brain (red) and lung (blue) tissues in *M. tuberculosis*-infected mice with TB meningitis receiving multidrug regimens. **a**, Moxifloxacin (data from three animals; n = 3 brain, n = 3 lung samples). Brain levels are significantly lower than in lung tissues (*P* = 0.008). **b**, Pyrazinamide (data from six animals; n = 6 brain, n = 6 lung samples). Data are represented as median ± interquartile range.

**
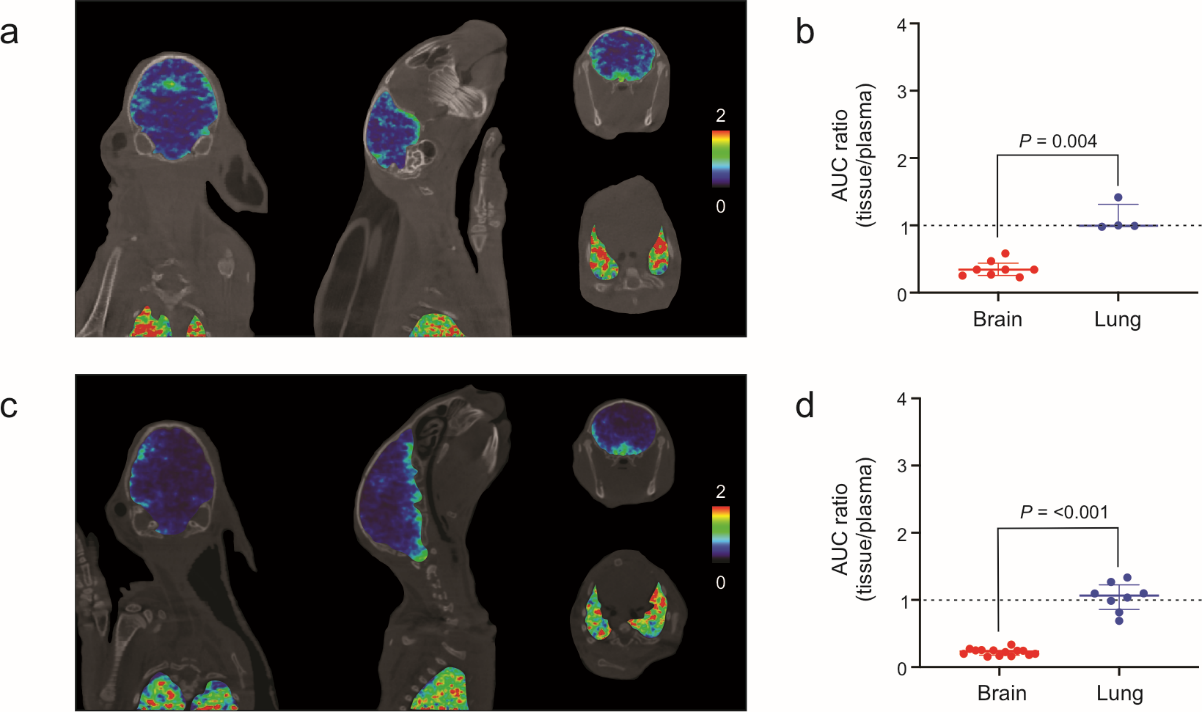
**

**Fig. S8. Compartmentalized antibiotic exposures in rabbit studies.** 18F-Sutezolid and 18F-linezolid PET was performed in rabbit studies. Each radioanalog is chemically identical to the respective parent antibiotic and the radioisotope is retained within the major metabolite. Coronal, sagittal and transverse CT with PET AUC heatmap overlays (representing AUCtissue/plasma ratio) from representative rabbits, demonstrating spatially compartmentalized antibiotic exposures in lung and brain compartments are shown for (**a**) 18F-sutezolid (AUC0-60min,data from two animals; n = 8 brain VOIs, n = 4 lung VOIs) and (**b**) 18F-linezolid (AUC0-60min, data from four animals; n = 14 brain VOIs, n = 8 lung VOIs). Data are represented as median ± interquartile range. Statistical comparisons were made using a two-tailed Mann-Whitney U test.

**
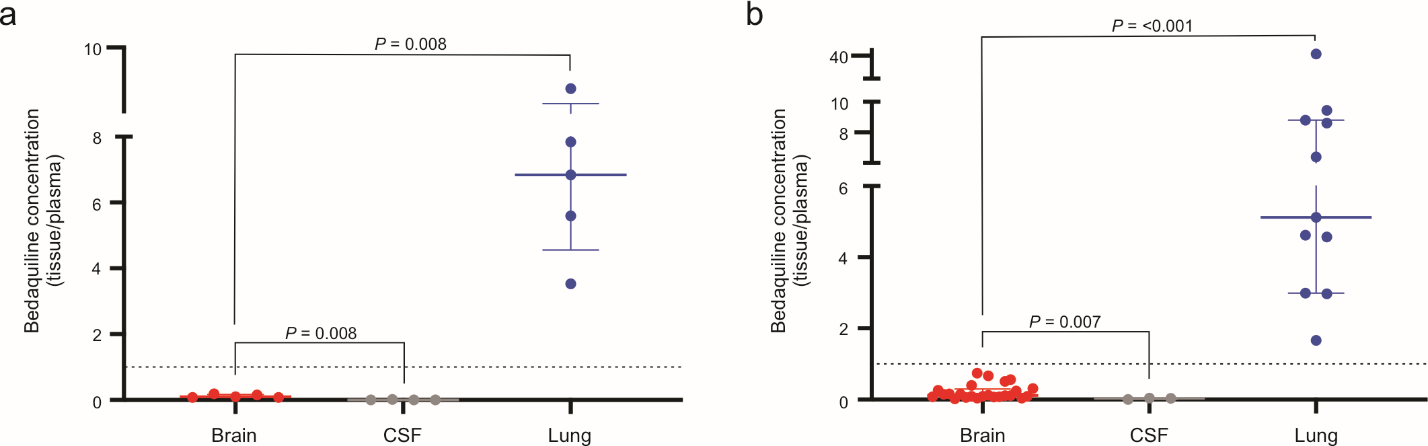
Fig. S9. Bedaquiline tissue penetration using mass spectrometry.** Tissue-to-plasma ratios from brain (red), CSF (grey) and lung (blue) tissues in *M. tuberculosis*-infected animals. **a**, Mice with TB meningitis receiving multidrug regimens (data from five animals; n = 5 brain, n = 5 lung, n = 4 CSF samples). Brain levels are significantly lower than in lung tissues, while CSF levels are significantly lower than in brain tissues. **b**, Rabbits after aerosol infection with *M. tuberculosis* receiving multidrug regimens (data from four animals; n = 24 brain, n = 11 lung, n = 3 CSF samples). Brain levels are significantly lower than in lung tissues, while CSF levels are significantly lower than in brain tissues. Data are represented as median ± interquartile range. Statistical comparisons were made using a two-tailed Mann-Whitney U test.

**
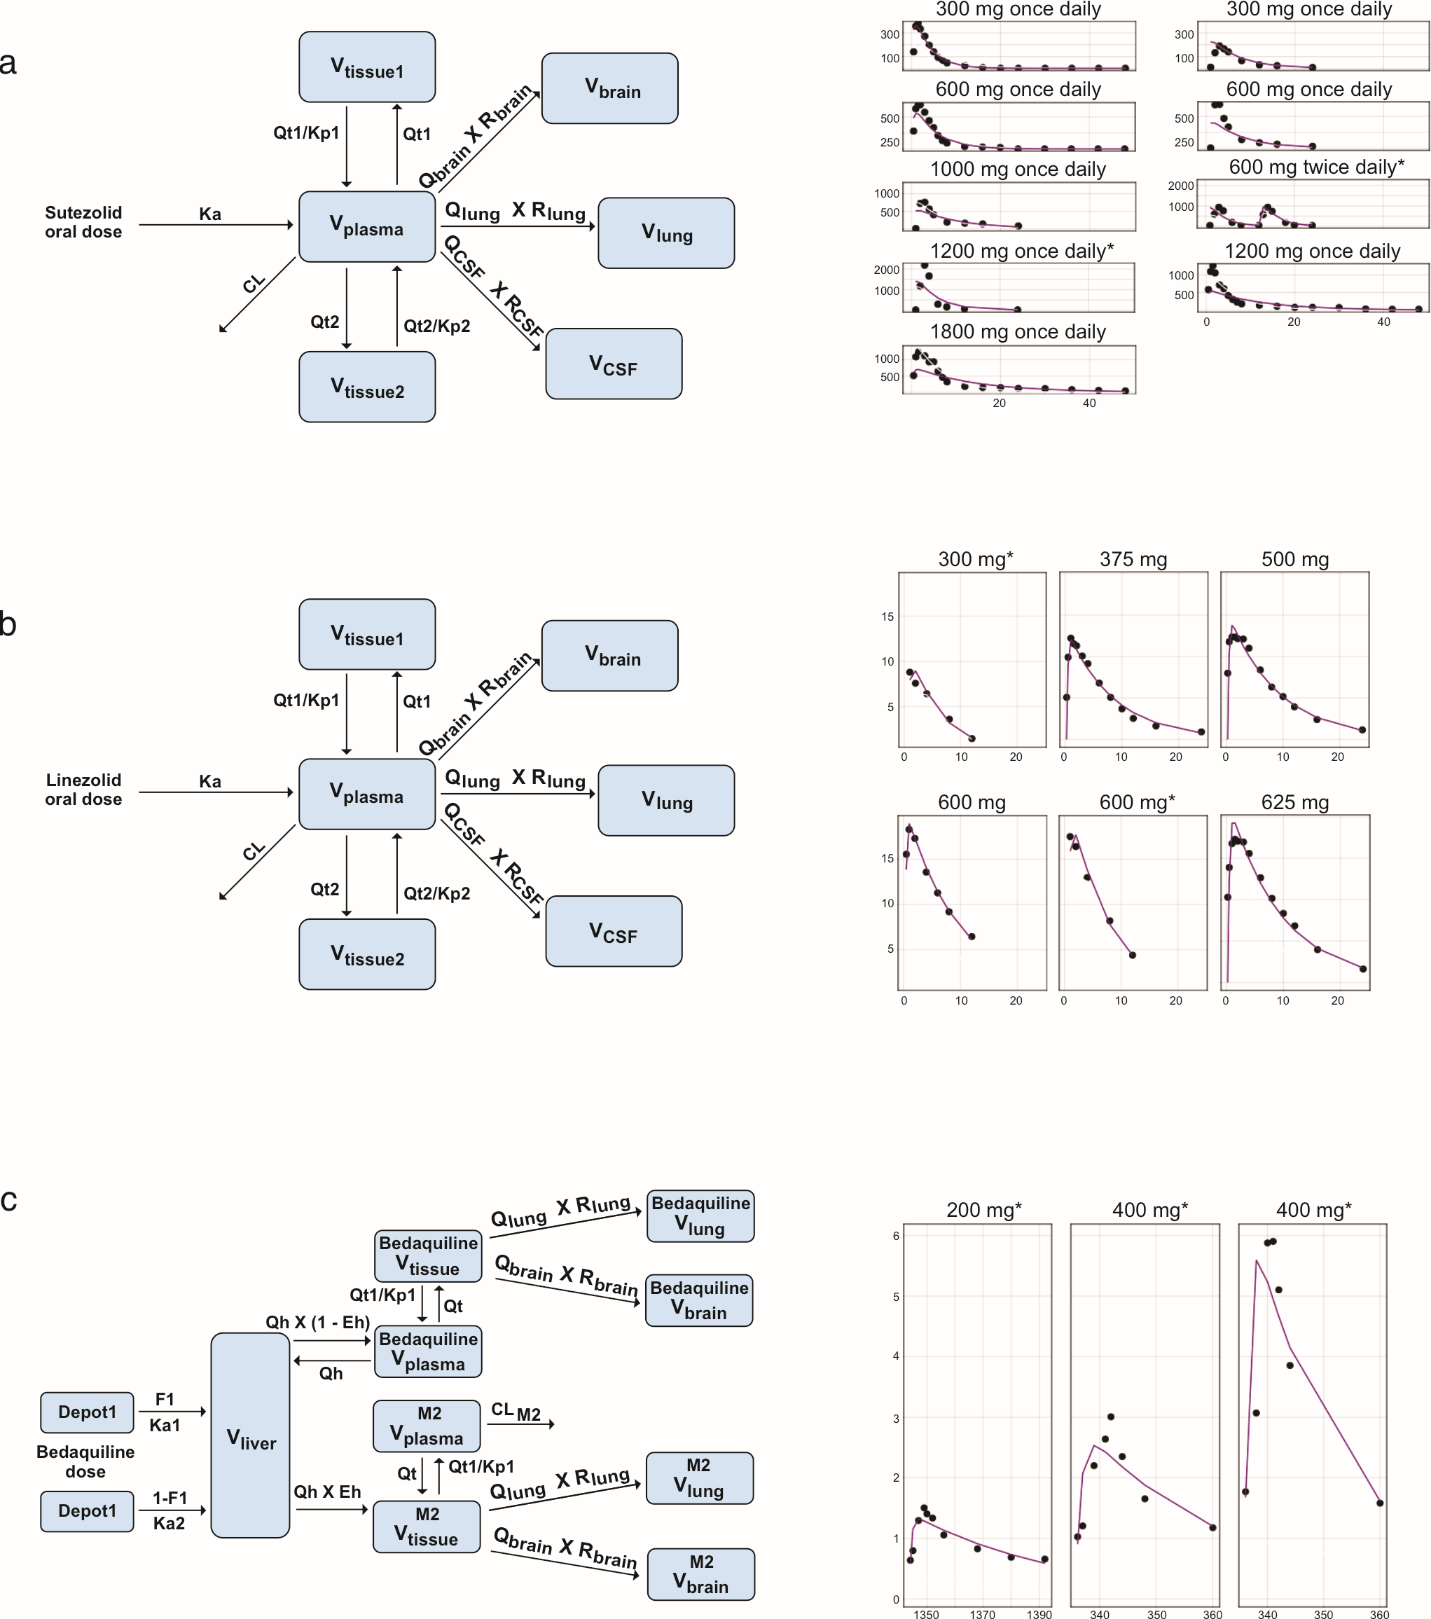
Fig. S10. Pharmacokinetic models to predict human tissue exposures.** Schematic representation of models for sutezolid (panel **a**), linezolid (panel **b**), and bedaquiline (panel **c**) based on a physiology-based pharmacokinetic (mPBPK) framework. Observed (black dots – digitized from published data) and individual model-predicted (purple line) for plasma exposures in human subjects are shown. Graphs marked with (*) show data from TB patients, while the others are from healthy subjects. Y-axis shows antibiotic exposure and x-axis shows time (hours). CL = plasma clearance, DoseF = dose-dependent bioavailability, Eh = hepatic extraction ratio, F1 = bioavailability of depot1, ka1 = absorption rate from depot1, ka2 = absorption rate from depot2, Kp = partition coefficient for tissue compartments, Qh = blood flow rate to liver, Qt = blood flow rate to tissues, Qlung = blood flow rate to lungs, Qbrain = blood flow rate to brain, QCSF = blood flow to ventricles, Rbrain = penetration ratio for brain, RCSF = penetration ratio for CSF, Rlung = penetration ratio for lung.

**
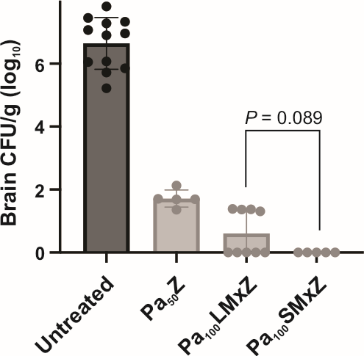
**

**Fig. S11. Bactericidal activity of multidrug regimens in mice with TB meningitis at human equipotent dosing.** Bacterial burden [colony-forming unit (CFU) per gram of brain tissue (log10) from whole brain] after six weeks of multidrug regimens at human equipotent dosing (n = 5-9 mice/regimen) are shown from studies in the mouse model of TB meningitis (Z, pyrazinamide; Pa50 or Pa100, pretomanid corresponding to a human dose of 200 mg/day or 400-600 mg/day respectively; L, linezolid; S, sutezolid; Mx, moxifloxacin). Data are represented as mean ± standard deviation. Data are represented as median ± interquartile range. Statistical comparisons were made using a two-tailed student t-test.

**
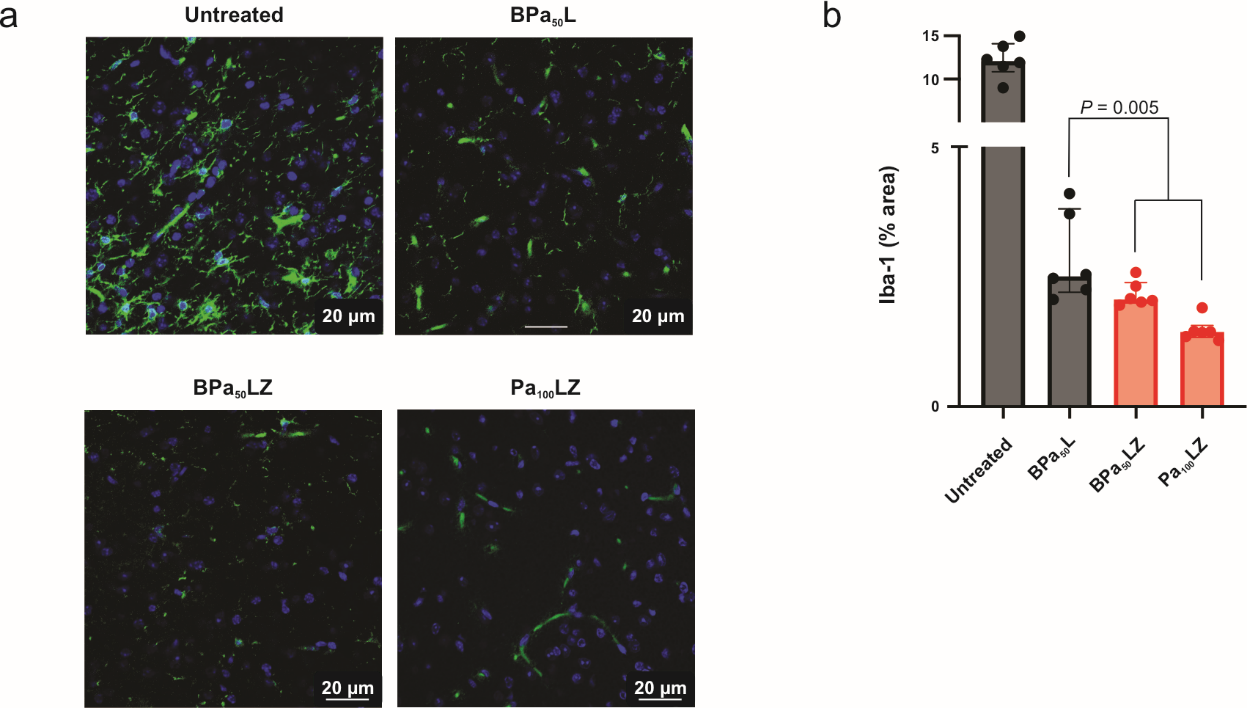
**

**Fig. S12. Intracerebral inflammation in mice with TB meningitis.** Brain tissues obtained after two weeks of multidrug regimens at human equipotent dosing were utilized from studies in the mouse model of TB meningitis (Z, pyrazinamide; Pa50 or Pa100, pretomanid corresponding to a human dose of 200 mg/day or 400-600 mg/day respectively; B = bedaquiline; L, linezolid). Fixed mice brain tissues (n = 3 animals/regimen; two sections per animal) were sectioned following overnight incubation at 4˚C with primary antibody against Iba-1 (Wako 019-19741, 1:500) and secondary goat Alexa-fluor 488 antibody (Thermo Fisher, A11034, 1:1000). **a**, Sections were washed and mounted with DAPI (Thermo Fisher, ProLong™ Gold Antifade Mountant with DNA Stain DAPI) and visualized using the Zeiss LSM 710 confocal microscope at 40x resolution (panel). **b**, Six images per regimen were processed in ImageJ (Fiji) to determine the % area staining for Iba-1. There was significantly lower microglial density in animals treated with pyrazinamide-containing regimens.The optimized and reference regimens are shown in red and black respectively. Data are represented as median ± interquartile range. Statistical comparisons were made using a two-tailed Mann-Whitney U test.

**
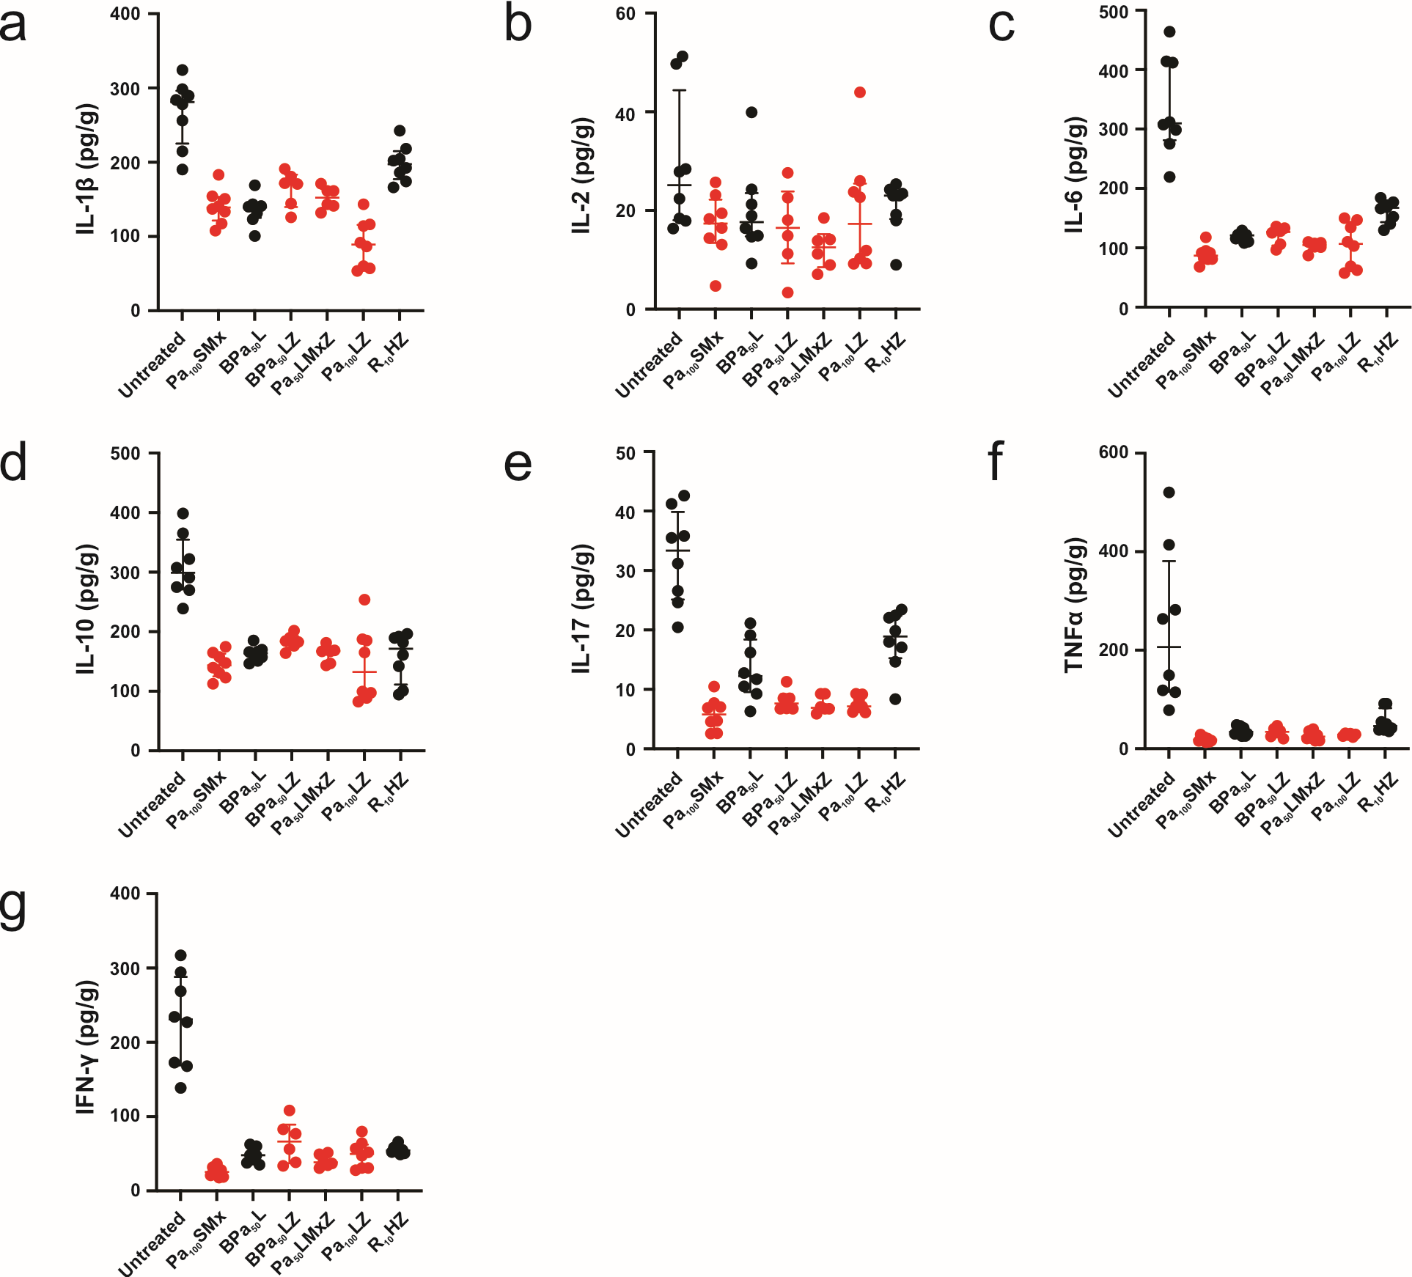
**

**Fig. S13.**  **Brain cytokines in mice with TB meningitis.** Mice receiving multidrug regimens via oral gavage at human equipotent dosing (Z, pyrazinamide; B, bedaquiline; Pa50 or Pa100, pretomanid corresponding to a human dose of 200 mg/day or 400-600 mg/day respectively; L, linezolid; S, sutezolid; Mx, moxifloxacin; R, rifampin, H, isoniazid) underwent postmortem analysis at two weeks after treatment initiation. Cytokine levels (n = 3-4 mice/regimen, each in duplicate) for the optimized (red) and reference regimens (black) are shown respectively. Data are represented as median ± interquartile range.

**
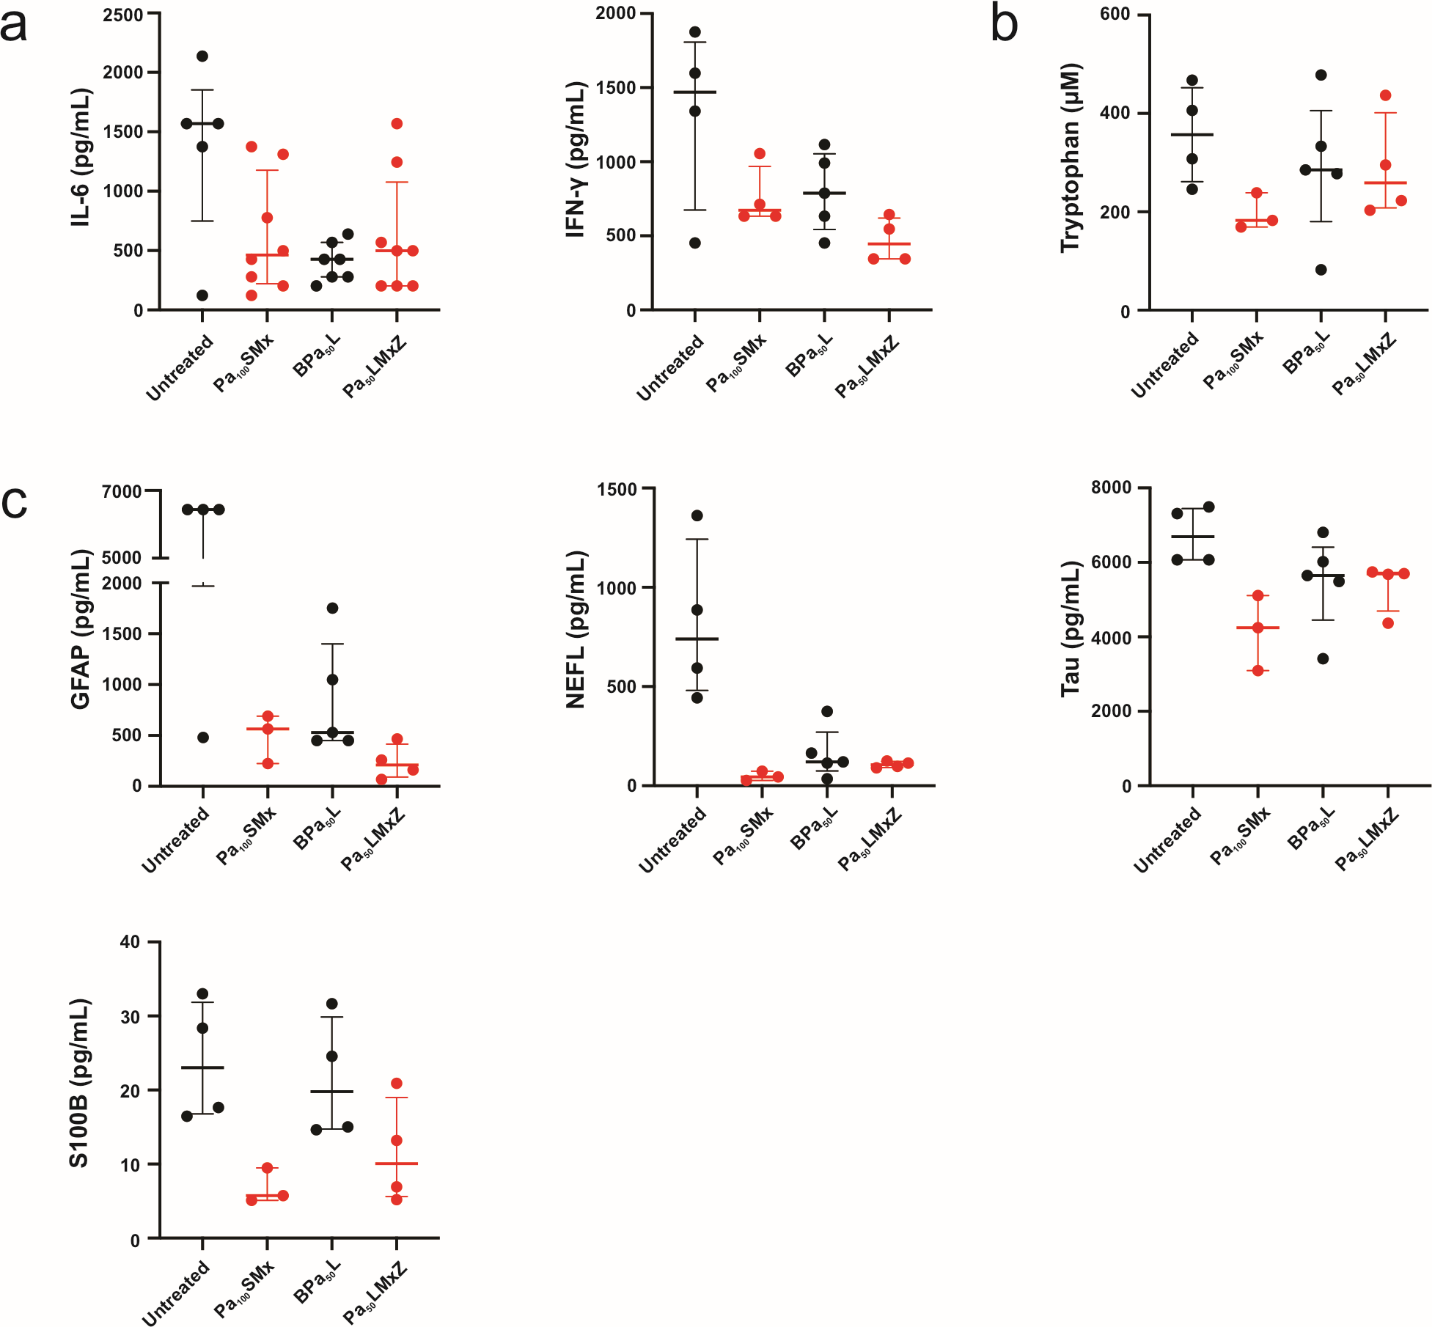
Fig. S14.**  **CSF cytokine, tryptophan and brain injury markers in mice with TB meningitis.** Mice receiving multidrug regimens via oral gavage at human equipotent dosing (Z, pyrazinamide; B, bedaquiline; Pa50 or Pa100, pretomanid corresponding to a human dose of 200 mg/day or 400-600 mg/day respectively; L, linezolid; S, sutezolid; Mx, moxifloxacin) underwent postmortem analysis at two weeks after treatment initiation. **a**, Cytokine levels (n = 4-5 mice/regimen), **b**, Tryptophan (n = 3-5 mice/regimen). **c**, Brain injury markers (n = 3-5 mice/regimen) – GFAP (glial fibrillary acidic protein), NEFL (neurofilament light polypeptide), Tau and S100B. The optimized and reference regimens are shown in red and black respectively. Data are represented as median ± interquartile range.

**
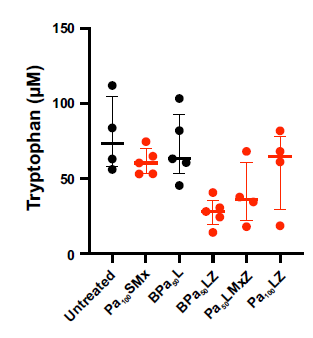
Fig. S15. Plasma tryptophan levels.** Plasma tryptophan levels from studies in the mouse model of TB meningitis two weeks after initiation of multidrug regimens at human equipotent dosing (Z, pyrazinamide; Pa50 or Pa100, pretomanid corresponding to a human dose of 200 mg/day or 400-600 mg/day respectively; B = bedaquiline; L, linezolid; S, sutezolid; Mx, moxifloxacin) are shown (n = 4-5 mice/regimen). The optimized and reference regimens are shown in red and black respectively. Data are represented as median ± interquartile range.

**
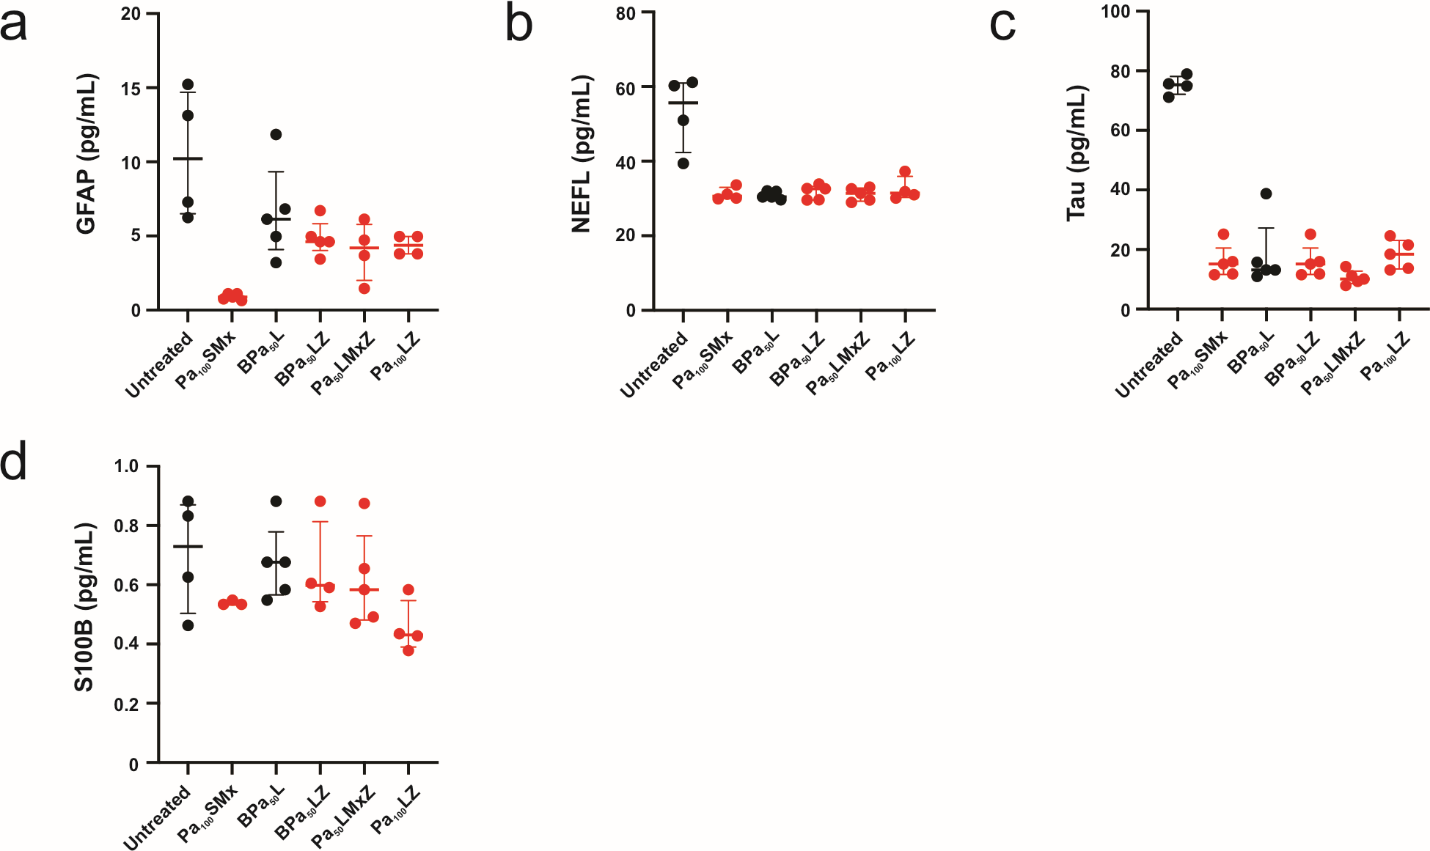
Fig. S16. Plasma brain injury markers.** Levels of plasma brain injury markers, GFAP (glial fibrillary acidic protein), NEFL (neurofilament light polypeptide), Tau and S100B from studies in the mouse model of TB meningitis two weeks after initiation of multidrug regimens at human equipotent dosing (Z, pyrazinamide; Pa50 or Pa100, pretomanid corresponding to a human dose of 200 mg/day or 400-600 mg/day respectively; B = bedaquiline; L, linezolid; S, sutezolid; Mx, moxifloxacin) are shown (n = 4-5 mice/regimen). The optimized and reference regimens are shown in red and black respectively. Data are represented as median ± interquartile range.

**Tables**

| **ID** | **Gender** | **Age (years)** | **Weight (kg)** | **BMI (kg/m2)** | **18F-Pretomanid** | | **Hematocrit (%)** | **Albumin (g/dL)** |
| --- | --- | --- | --- | --- | --- | --- | --- | --- |
| **Dose (MBq)** | **Specific activity (GBq/µmol)** |
| 1 | M | 28 | 84 | 27.5 | 355.2 | 38.7 | 43 | 4.5 |
| 2 | F | 20 | 68 | 26.6 | 362.6 | 41.7 | 40 | 4.6 |
| 3 | F | 29 | 75 | 28.2 | 358.9 | 23.6 | 39.3 | 4.8 |
| 4 | F | 24 | 48 | 18.3 | 358.9 | 40.7 | 38.7 | 4.7 |
| 5 | M | 53 | 98 | 31.5 | 362.6 | 62.7 | 41.5 | 4.3 |
| 6 | M | 35 | 116 | 37.8 | 358.5 | 34.2 | 43.7 | 4.6 |
| 7* | F | 29 | 59 | 23 | 334.1 | 66.7 | 37.5 | 4.2 |
| 8* | F | 31 | 57 | 23.8 | 380.4 | 56 | 38.3 | 4.3 |

**Table S1. Human 18F-pretomanid PET studies.** BMI=body mass index, M=male, F=female. *Patients with pulmonary TB.

| - Male or female ≥18 years of age at the time of imaging. - Healthy subjects OR subjects with culture confirmation of *Mycobacterium tuberculosis* or sputum positive by molecular testing (GeneXpert) OR high suspicion of active tuberculosis by treating physician (and confirmed by the study Infectious Diseases physician). - For TB patients: Imaging evidence of suspected *M. tuberculosis* infection involving the lung, and possible additional other sites of involvement. After TB diagnosis is confirmed, patients will be eligible to participate up to 6 weeks after starting TB treatment. - Screening clinical laboratory values must be within normal limits or judged not clinically significant by the investigator. - Women of child-bearing potential must have a negative serum or urine pregnancy test within 24 hours prior to the radiotracer administration. - Patients or their legal representatives must have the ability to provide written informed consent. - Subject is willing and able to comply with the protocol for the duration of the study including undergoing scheduled visits and study procedures. |
| --- |

**Table S2. Selection criteria for enrollment in the clinical study.**

| **Radiotracer** | **Mouse dose (MBq)** | **Rabbit dose (MBq)** | **PET imaging protocol** |
| --- | --- | --- | --- |
| 18F-Pretomanid | 5.38 ± 0.88 |  | Immediately after tracer injection, 60 min dynamic |
| 18F-Sutezolid | 1.98 ± 1.14 | 5.78 ± 1.17 | Immediately after tracer injection, 60 min dynamic |
| 18F-Linezolid | 5.21 ± 1.27 | 5.50 ± 1.50# | Immediately after tracer injection, 60 min dynamic |
| 76Br-Bedaquiline | 1.30 ± 0.12† |  | 60, 240, 300 min and 24 and 48 hours |
| 124I-DPA-713 | 12.11 ± 2.80 |  | 24 hours after tracer injection, 30 min static |

**Table S3. Radiotracer dose.** Radiotracer doses used in the animal models and the imaging duration are shown. The physical half-life of F-18 and Br-76 is 109 min and 16.2 hours respectively. From #Tucker *et al*. Int J Antimicrob Agents. 2024, and †Ordonez *et al*. ACS Infect. Dis. 2019.

| **Mouse** | **Plasma/Blood** |
| --- | --- |
| 1 | 0.90 |
| 2 | 0.96 |
| 3 | 1.09 |
| 4 | 1.34 |
| Average | 1.07 |

**Table S4. Partition coefficient for 18F-sutezolid.**

| **Mouse** | **Plasma/Blood** |
| --- | --- |
| 1 | 0.88 |
| 2 | 1.58 |
| 3 | 3.53 |
| 4 | 1.87 |
| 5 | 1.11 |
| 6 | 0.81 |
| 7 | 0.39 |
| 8 | 1.67 |
| 9 | 1.29 |
| 10 | 0.99 |
| 11 | 0.79 |
| 12 | 2.36 |
| Average | 1.44 |

**Table S5. Partition coefficient for bedaquiline.**

| **Drug** | **Mouse dose (mg/kg/day)** | **Human dose**  **(mg/kg)** | **Route of administration** |
| --- | --- | --- | --- |
| Pretomanid (Pa50) | 50 divided BID | 200 | Oral |
| Pretomanid (Pa100) | 100 divided BID | 400-600 | Oral |
| Sutezolid | 100 divided BID | 1200 | Oral |
| Linezolid | 100 divided BID | 1200 | Oral |
| Bedaquiline | 25 | 400 | Oral |
| Pyrazinamide | 150 | 25 | Oral |
| Moxifloxacin | 100 | 400 | Oral |
| Dexamethasone | 2 | 0.4 | Intraperitoneal |

**Table S6. Antibiotic dosing.** Doses used in mice with the corresponding human equipotent doses are shown. BID = twice a day.

| **Parameter** | **Human​** | **Mice** | **Source** |
| --- | --- | --- | --- |
| Apparent clearance (CL)​(L/h) | 4.42​ | 0.016​ | Literature model​* |
| Absorption rate constant (Ka) (1/hr) | 0.3 | 0.3 | Literature model​* |
| FT1 (Fraction going to tissue 1)​ | 0.975​ | 0.975​ | Literature model* |
| BP (Blood to plasma ratio)​ | 1 | 1.65​ | Literature model​* |
| KPT1 (Partition coefficient for tissue compartment 1)​ | 36.3​ | 36.3​ | Literature model​* |
| KPT2 (Partition coefficient for tissue compartment 2)​ | 0.48 | 0.48 | Literature model* |
| Rbrain (Penetration ratio for brain)​ | 2.25 | 1.41 | Estimated from data​ |
| RCSF (Penetration ratio for CSF)​ | 1.77 | - | Estimated from data​  ​ |
| RLung (Penetration ratio for lung)​ | 0.97 | 1.07 | Estimated from data ​ |

**Table S7. Pretomanid pharmacokinetic model parameter estimates.** *Mehta *et al*. Clin Pharmacokinet. 2023.

| **Parameter** | **Sutezolid** | **Source** |
| --- | --- | --- |
| Apparent clearance (CL)​(L/h) | 166.98 | Digitized data fit |
| Absorption rate constant (Ka) (1/h) | 0.16 | Digitized data fit |
| FT1 (Fraction going to tissue 1)​ | 0.975 | Literature model​* |
| BP (Blood to plasma ratio)​ | 1 | Literature model​* |
| KPT1 (Partition coefficient for tissue compartment 1)​ | 0.99 | Digitized data fit ​ |
| KPT2 (Partition coefficient for tissue compartment 2)​ | 0.88 | Digitized data fit ​ |
| Rbrain (Penetration ratio for brain)​ | 0.29 | Estimated from data​ |
| RLung (Penetration ratio for lung)​ | 0.92 | Estimated from data ​ |

**Table S8. Sutezolid** **pharmacokinetic model parameter estimates.** *Mehta *et al*. Clin Pharmacokinet. 2023.

| **Parameter** | **Linezolid** | **Source** |
| --- | --- | --- |
| Apparent clearance (CL)​(L/h) | 7.69 | Literature model​ (PopPK) |
| Absorption rate constant (Ka) (1/h) | 0.68 | Literature model​ (PopPK) |
| FT1 (Fraction going to tissue 1)​ | 0.975​ | Literature model* |
| BP (Blood to plasma ratio)​ | 1 | Literature model​* |
| KPT1 (Partition coefficient for tissue compartment 1)​ | 0.96 | Optimized using digitized data​ |
| KPT2 (Partition coefficient for tissue compartment 2)​ | 0.36 | Optimized using digitized data |
| Rbrain (Penetration ratio for brain)​ | 0.28 | Estimated from PET data​ |
| RLung (Penetration ratio for lung)​ | 1.12 | Estimated from PET data ​ |

**Table S9. Linezolid pharmacokinetic model parameter estimates.** *Mehta *et al*. Clin Pharmacokinet. 2023.

| **Parameter** | **Bedaquiline​** | **Source** |
| --- | --- | --- |
| Fup (Unbound fraction) (%) | 0.1 | Literature model​* |
| CLint (Apparent clearance of BDQ) (L/h) | 60.3 | Literature model​* |
| CLM2 (Apparent clearance of BDQ- M2) ​(L/h) | 45.9 | Literature model​* |
| Ka1 (Absorption rate from depot1) (1/h) | 1.3 | Literature model​* |
| Ka2 (Absorption rate from depot2) (1/h) | 0.00501 | Literature model​* |
| Frc (Fraction going through fast absorption) | 0.609 | Literature model​* |
| BP (Blood to plasma ratio)​ | 1 | Literature model​* |
| KPT (Partition coefficient for tissue compartments)​ | 4.45 | Literature model​* |
| KPTM2 (Partition coefficient for tissue compartments for M2)​ | 18.4 | Literature model​* |
| Rbrain (Penetration ratio for brain)​ | 0.21 | Estimated from data​ |
| RLung (Penetration ratio for lung)​ | 2.19 | Estimated from data ​ |

**Table S10. Bedaquiline pharmacokinetic model parameter estimates.** *Mehta *et al*. Clin Pharmacokinet. 2023.

| **Pharmacokinetic model** | **Publication** | **PMID** |
| --- | --- | --- |
| Sutezolid | Wallis *et al*. PLoS One. 2014*  Bruinenberg *et al*. Antimicrob Agents Chemother. 2022 | 24732289  35285241 |
| Linezolid | Alffenaar *et al*. Clin Pharmacokinet. 2010*  FDA - ZYVOX ® (linezolid) tablet label  Staker *et al*. J Antimicrob Chemother. 2003  Tietjen *et al*. Br J Clin Pharmacol. 2022* | 20608757  12668582  34622478 |
| Bedaquiline | Diacon *et al*. N Engl J Med. 2009*  Tsuyuguchi *et al*. Respir Investig. 2019* | 19494215  30745177 |

**Table S11. Digitalized data used for external validation.** The pharmacokinetic models were externally validated using digitized data from clinical studies in TB patients (*), and healthy subjects.
